# Supplementary material for: Palladium–iminophosphine-catalysed carbostannylation of arynes: synthesis of ortho-substituted arylstannanes
Source: Royal Society of Chemistry journal article supplement (doi:10.1039/b103745p), 2001-01-01
Supplement: b103745p.doc [file b103745p.doc]

**Supplementary Information for**

**Palladium–iminophosphine-catalysed carbostannylation of arynes:**

**synthesis of *ortho*-substituted arylstannanes**

**Hiroto Yoshida,*a* Yuki Honda,*a* Eiji Shirakawa**b* and Tamejiro Hiyama**a***

*aDepartment of Material Chemistry, Graduate School of Engineering, Kyoto University, Sakyo-ku, Kyoto 606-8501, Japan.*

*bGraduate School of Materials Science, Japan Advanced Institute of Science and Technology, Asahidai, Tatsunokuchi, Ishikawa 923-1292, Japan.*

**General Remarks.** All manipulations of oxygen- and moisture-sensitive materials were conducted with a standard Schlenk technique under a purified argon atmosphere (deoxygenated by passing through BASF-Catalyst R3-11 column at 80 °C). Nuclear magnetic resonance spectra were taken on a JEOL EX-270 (1H, 270 MHz; 13C, 67.8 MHz; 119Sn, 101 MHz) spectrometer or a Varian Mercury 200 (1H, 200 MHz; 13C, 50 MHz) spectrometer using tetramethylsilane (1H) as an internal standard or tetramethyltin (119Sn) as an external standard. The preparative recycling gel permeation chromatography (GPC) was performed with JAI LC-908 equipped with JAIGEL-1H and -2H columns (chloroform as an eluent). High-resolution mass spectra were obtained with a JEOL JMS-700 spectrometer. All melting points were measured with a Yanagimoto Micro Melting Point apparatus and uncorrected. Unless otherwise noted, commercially available reagents were used without purification. Solvents were distilled from a suitable drying reagent as follows: sodium/benzophenone ketyl for THF; calcium hydride for DMF and NMP; phosphorus pentoxide for acetonitrile. *N*-(2-Diphenylphosphinobenzylidene)-2-phenylethylamine (**1**),[[1]](#endnote-2) tributyl(phenylethynyl)tin (**2a**),[[2]](#endnote-3) tributyl(3,3-dimethyl-1-butynyl)tin (**2b**),2 tributyl(1-hexynyl)tin (**2c**),2 tributyl(1-propynyl)tin (**2d**),[[3]](#endnote-4) tributyl(3-methoxy-1-propynyl)tin (**2e**),2 tributyl(3-methyl-3-buten-1-ynyl)tin (**2f**),2 tributyl[2-(1-cyclohexenyl)ethynyl]tin (**2g**),2 tributyl(vinyl)tin (**2h**),[[4]](#endnote-5) 2-(trimethylsilyl)phenyl triflate (**3a**),[[5]](#endnote-6) 4-methyl-2-(trimethylsilyl)phenyl triflate (**3b**),[[6]](#endnote-7) 5-methyl-2-(trimethylsilyl)phenyl triflate (**3c**),6 3-methoxy-2-(trimethylsilyl)phenyl triflate (**3d**)[[7]](#endnote-8) and 1-(trimethylsilyl)naphthyl 2-triflate (**3e**)[[8]](#endnote-9) were prepared according to literature procedures.

**Carbostannylation of Arynes. *A General Procedure.*** A MeCN solution (3 mL) of **1** (6.3 mg, 0.016 mmol), [Pd2Cl2(3-C3H5)2](3.0 mg, 8.2 mol), and CsF (0.11 g, 0.69 mmol) was degassed by three freeze-thaw cycles. To this solution was added an organostannane (0.34 mmol) and an aryne precursor (0.69 mmol), and the resulting mixture was stirred at 50 °C for the time specified in Table 1 and Scheme 3. Concentration in vacuo followed by GPC purification gave the corresponding carbostannylation product. Yields are listed in Table 1 and Scheme 3.

**Tributyl[2-(phenylethynyl)phenyl]tin (4a).** A yellow oil:1H NMR (CDCl3) 0.78 (t, *J* = 7.2 Hz, 9 H), 1.10 (t, *J* = 8.3 Hz, 6 H), 1.16–1.36 (m, 6 H), 1.36–1.68 (m, 6 H), 7.16–7.36 (m, 5 H), 7.36–7.56 (m, 4 H);13C NMR (CDCl3) 10.0, 13.7, 27.4, 29.2, 89.1, 92.0, 123.5, 127.4, 127.7, 128.0, 128.1, 128.3, 130.8, 131.4, 131.7, 131.9, 136.3, 146.1; 119Sn{1H} NMR (CDCl3)  -40.1; Anal. Calcd for C26H40Sn: C, 67.07; H, 7.51. Found: C, 66.83; H, 7.77.

**Tributyl[2-(3,3-dimethyl-1-butynyl)phenyl]tin (4b).** A colorless oil:1H NMR (CDCl3) 0.93 (t, *J* = 7.2 Hz, 9 H), 1.05–1.23 (m, 6 H), 1.37 (s, 9 H), 1.28–1.46 (m, 6 H), 1.52–1.68 (m, 6 H), 7.21–7.28 (m, 2 H), 7.42–7.47 (m, 2 H);13C NMR (CDCl3) 9.9, 13.7, 27.4, 27.9, 29.1, 31.0, 81.7, 97.9, 126.6, 127.8, 131.6, 132.1, 136.1, 144.8; 119Sn{1H} NMR (CDCl3)  -41.1; Anal. Calcd for C24H40Sn: C, 64.45; H, 9.01. Found: C, 64.75; H, 8.94.

**Tributyl[2-(1-hexynyl)phenyl]tin (4c).** A yellow oil:1H NMR (CDCl3) 0.75–1.69 (m, 33 H), 2.43 (t, *J* = 7.0 Hz, 3 H), 7.20–7.44 (m, 4 H);13C NMR (CDCl3) 9.9, 13.6, 13.7, 19.3, 22.2, 27.4, 29.2, 30.8, 83.1, 90.1, 126.7, 127.8, 131.5, 131.6, 136.1, 145.6; 119Sn{1H} NMR (CDCl3)  -41.9; Anal. Calcd for C24H40Sn: C, 64.45; H, 9.01. Found: C, 64.69; H, 9.01.

**Tributyl[2-(1-propynyl)phenyl]tin (4d).** A yellow oil:1H NMR (CDCl3) 0.91 (t, *J* = 7.1 Hz, 9 H), 1.09–1.18 (m, 6 H), 1.20–1.50 (m, 6 H), 1.50–1.80 (m, 6 H), 2.07 (s, 3 H) 7.18–7.28 (m, 2 H), 7.30–7.59 (m, 2 H)13C NMR (CDCl3) 4.5, 9.9, 13.7, 27.4, 29.2, 82.5, 85.6, 126.8, 127.9, 131.2, 131.5, 136.1, 146.0; 119Sn{1H} NMR (CDCl3)  -42.2; Anal. Calcd for C21H34Sn: C, 62.25; H, 8.46. Found: C, 62.47; H, 8.75.

**Tributyl[2-(3-methoxy-1-propynyl)phenyl]tin (4e).** A yellow oil:1H NMR (CDCl3) 0.89 (t, *J* = 7.1 Hz, 9 H), 1.10–1.15 (m, 6 H), 1.24–1.39 (m, 6 H), 1.42–1.64 (m, 6 H), 3.46 (s, 3 H), 4.34 (s, 2 H), 7.24–7.31 (m, 2 H) , 7.43–7.51 (m, 2 H);13C NMR (CDCl3) 9.9, 13.7, 27.4, 29.1, 57.6, 60.5, 84.8, 88.9, 127.6, 127.9, 130.1, 132.0, 146.3; 119Sn{1H} NMR (CDCl3)  -40.4.

**Tributyl[2-(3-methyl-3-buten-1-ynyl)phenyl]tin (4f).** An orange oil:1H NMR (CDCl3) 0.88 (t, *J* = 7.1 Hz, 9 H),1.10-1.18 (m, 6 H), 1.23–1.41 (m, 6 H), 1.47–1.60 (m, 6 H), 1.99 (dd, *J* = 1.1, 0.4 Hz, 3 H), 5.30 (m, 1 H), 5.30 (m, 1 H), 7.21–7.26 (m, 2 H), 7.42–7.46 (m, 2 H);13C NMR (CDCl3) 9.9, 13.7, 23.5, 27.4, 29.1, 90.3, 91.1, 121.7, 127.0, 127.3, 127.9, 130.8, 131.8, 136.2, 146.0; 119Sn{1H} NMR (CDCl3)  -40.8; Anal. Calcd for C23H36Sn: C, 64.06; H, 8.41. Found: C, 64.18; H, 8.41.

**Tributyl{2-[2-(1-cyclohexenyl)ethynyl]phenyl}tin (4g).** A yellow oil:1H NMR (CDCl3) 0.91 (t, *J* = 7.3 Hz, 9 H)1.16 (t, *J* = 8.2 Hz, 6 H),1.52–1.72 (m, 10 H), 2.17–2.25 (m, 4 H), 6.21 (m, 1 H), 7.22–7.27 (m, 2 H), 7.44–7.47 (m, 2 H);13C NMR (CDCl3) 9.9, 13.7, 21.6, 22.4, 25.8, 27.4, 29.2, 89.4, 91.1, 100.5, 120.9, 126.9, 127.9, 131.4, 131.6, 134.8, 136.1, 145.7; 119Sn{1H} NMR (CDCl3)  -41.4; Anal. Calcd for C26H40Sn: C, 66.26; H, 8.55. Found: C, 66.29; H, 8.43.

**Tributyl[2-(vinyl)phenyl]tin (4h).** A yellow oil:1H NMR (CDCl3) 0.88 (t, *J* = 7.2 Hz, 9 H), 1.08 (t, *J* = 8.1 Hz, 6 H), 1.13–1.41 (m, 6 H), 5.27 (d, *J* = 10.8 Hz, 1 H), 5.66 (d, *J* = 17.5 Hz, 1 H), 6.77 (dd, *J* = 17.5, 10.8 Hz, 1 H), 7.48–7.68 (m, 2 H), 7.53 (d, *J* = 21.1 Hz, 1 H), 7.61 (d, *J* = 7.5 Hz, 1 H);13C NMR (CDCl3) 10.3, 13.6, 27.3, 29.1, 114.6, 124.7, 126.9, 128.4, 136.7, 139.8, 142.6, 144.8; 119Sn{1H} NMR (CDCl3)  -40.1.

**Tributyl[4-methyl-2-(phenylethynyl)phenyl]tin (4i).** A colorless oil:1H NMR (CDCl3) 0.83 (t, *J* = 7.1 Hz, 9 H), 1.14 (t, *J* = 8.1 Hz, 6 H), 1.20–1.44 (m, 6 H), 1.46–1.72 (m, 6 H), 2.33 (s, 3 H), 7.11 (dd, *J* = 7.6, 1.2 Hz, 1 H), 7.26–7.40 (m, 4 H), 7.48–7.57 (m, 3 H); 13C NMR (CDCl3) 10.0, 13.7, 21.1, 27.4, 29.2, 88.8, 92.1, 123.6, 128.1, 128.3, 128.5, 130.7, 131.4, 132.6, 136.3, 137.7, 142.1;119Sn{1H} NMR (CDCl3)  -40.5; Anal. Calcd for C27H38Sn: C, 67.38; H, 7.96. Found (as a mixture of **4i** and **5i**): C, 67.29; H, 7.76.

**Tributyl[5-methyl-2-(phenylethynyl)phenyl]tin (5i).** A colorless oil:1H NMR (CDCl3) 0.84 (t, *J* = 7.2 Hz, 9 H), 1.16 (t, *J* = 8.0 Hz, 6 H), 1.21–1.43 (m, 6 H), 1.46–1.78 (m, 6 H), 2.35 (s, 3 H), 7.10 (dd, *J* = 7.7, 0.5 Hz, 1 H), 7.28–7.40 (m, 4 H), 7.43 (s, 1 H), 7.45–7.55 (m, 2 H); 13C NMR (CDCl3) 10.0, 13.7, 21.6, 27.4, 29.2, 88.5, 92.2, 123.7, 127.7, 127.9, 128.3, 128.9, 131.4, 131.7, 137.0, 137.2, 145.8;119Sn{1H} NMR (CDCl3)  -41.1; Anal. Calcd for C27H38Sn: C, 67.38; H, 7.96. Found (as a mixture of **4i** and **5i**): C, 67.29; H, 7.76.

**Tributyl[3-methoxy-2-(phenylethynyl)phenyl]tin (4j).** A colorless oil:1H NMR (CDCl3) 0.83 (t, *J* = 7.2 Hz, 9 H), 0.99–1.42 (m, 12 H), 1.42–1.80 (m, 6 H), 3.91 (s, 3 H), 6.86 (d, *J* = 7.7 Hz, 1 H), 7.07 (dd, *J* = 7.7, 1.1 Hz, 1 H), 7.15–7.39 (m, 4 H), 7.42–7.60 (m, 2 H); 13C NMR (CDCl3) 10.1, 13.7, 27.4, 29.1, 55.7, 88.3, 93.6, 110.4, 119.3, 123.8, 128.0, 128.2, 128.3, 128.8, 131.5, 148.7, 160.1; 119Sn{1H} NMR (CDCl3)  -40.2; Anal. Calcd for C31H47OSn: C, 65.21; H, 7.70. Found: C, 65.03; H, 7.67.

**Tributyl[6-methoxy-2-(phenylethynyl)phenyl]tin (5j).** A colorless oil:1H NMR (CDCl3) 0.85 (t, *J* = 7.2 Hz, 9 H), 1.01–1.40 (m, 12 H), 1.42–1.80 (m, 6 H), 3.77 (s, 3 H), 6.58–6.68 (m, 1 H), 6.78 (dd, *J* = 7.7, 1.5 Hz, 1 H), 7.17–7.27 (m, 2 H), 7.30–7.38 (m, 2 H), 7.51–7.59 (m, 2 H); 13C NMR (CDCl3) 10.1, 13.6, 27.4, 29.1, 55.6, 88.3, 93.6, 110.4, 119.4, 123.8, 128.0, 128.2, 128.3, 128.8, 131.5, 148.7, 160.1; 119Sn{1H} NMR (CDCl3)  -44.0; Anal. Calcd for C31H47OSn: C, 65.21; H, 7.70. Found: C, 65.34; H, 7.96.

**2-(Tributylstannyl)-1-(phenylethynyl)naphthalene (4k).** A yellow oil:1H NMR (CDCl3) 0.85 (t, *J* = 7.3 Hz, 9 H), 1.00–1.45 (m, 12 H), 1.50–1.72 (m, 6 H), 7.26–7.70 (m, 8 H), 7.72–7.91 (m, 2 H), 8.46 (d, *J* = 8.8 Hz, 1 H);13C NMR (CDCl3) 10.3, 13.7, 27.5, 29.3, 90.2, 94.3, 123.7, 126.2, 126.3, 126.6, 127.4, 128.3, 128.4, 128.5, 128.9, 131.6, 132.6, 133.2, 133.8, 146.0; 119Sn{1H} NMR (CDCl3)  -39.9.

**1-(Tributylstannyl)-2-(phenylethynyl)naphthalene (5k).** A yellow oil:1H NMR (CDCl3) 0.88 (t, *J* = 7.0 Hz, 9 H), 1.26–1.46 (m, 12 H), 1.47–1.64 (m, 6 H), 7.26–7.59 (m, 8 H), 7.60–7.83 (m, 2 H), 7.86–7.98 (m, 1 H);13C NMR (CDCl3) 12.7, 13.6, 27.4, 29.2, 90.7, 92.7, 118.7, 123.6, 125.9, 126.0, 128.2, 128.4, 128.6, 129.6, 129.7, 130.2, 131.5, 132.7, 139.4, 147.5; 119Sn{1H} NMR (CDCl3)  -47.0.

**Cross-coupling of 4a with 4-nitroiodobenzene.** A DMF solution (1 mL) of **4a** (23 mg, 50 mol) and 4-nitroiodobenzene (13 mg, 75 mol) was degassed by three freeze-thaw cycles. To this solution was added CuI (7.2 mg, 38 mol) and Pd(PPh3)4 (6.2 mg, 5.0 mol), and the resulting mixture was stirred at 50 °C for 33 h before a 1 M KF aqueous solution (2 mL) was added. The mixture was stirred at room temperature for 30 min, filtered through a Celite plug, and extracted with ethyl acetate (10 mL). The organic layer was separated, washed successively with water and brine, and dried over anhydrous magnesium sulfate. Evaporation of the solvent followed by GPC gave 4-nitro-2’-(phenylethynyl)biphenyl (**8**)as a yellow solid:mp 65–67 _C; 1H NMR (CDCl3) 7.27–7.28 (m, 4 H), 7.42–7.46 (m, 4 H), 7.68–7.72 (m, 1 H), 7.85 (d, *J* = 7.7 Hz, 2 H), 8.33 (d, *J* = 7.7, Hz, 2 H);13C NMR (CDCl3) 88.2, 93.2, 121.7, 122.8, 123.2, 128.4, 128.6, 128.8, 129.3, 130.3, 131.3, 133.2, 141.3, 147.1, 147.2; HRMS for C20H13NO2, calcd: 299.0946, found: 299.0942.

**Cross-coupling of 4a with benzoyl chloride.** A NMP solution (1 mL) of **4a** (23 mg, 50 mol) and benzoyl chloride (11 mg, 75 mol) was degassed by three freeze-thaw cycles. To this solution was added Pd2(dba)3 (1.1 mg, 1.2 mol), and the resulting mixture was stirred at 30 °C for 48 h before a 1 M KF aqueous solution (2 mL) was added. The mixture was stirred at room temperature for 30 min, filtered through a Celite plug, and extracted with ethyl acetate (10 mL). The organic layer was separated, washed successively with water and brine, and dried over anhydrous magnesium sulfate. Evaporation of the solvent followed by GPC gave 2-(phenylethynyl)benzophenone (**9**) as a yellow oil:1H NMR (CDCl3) 6.90–7.08 (m, 2 H), 7.11–7.33 (m, 2 H), 7.34–7.65 (m, 8 H), 7.80–7.92 (m, 2 H);13C NMR (CDCl3) 87.4, 95.1, 121.9, 122.6, 128.1, 128.2, 128.4, 128.7, 129.0, 130.2, 130.3, 131.4, 132.5, 133.1, 137.4, 141.5, 197.1; HRMS for C21H14O, calcd: 282.1045, found: 282.1032.

**Reaction of 4a with benzaldehyde.** To a THF solution (2 mL) of **4a** (38 mg, 80 mol) was added dropwise butyllithium (1.5 M in hexanes, 80 L, 0.12 mmol) at -78 °C and the reaction mixture was stirred for 1 h before benzaldehyde (13 mg, 0.12 mmol) was added. The resulting mixture was allowed to warm slowly to room temperature and stirred for 1 h. After the addition of a saturated NH4Cl aqueous solution (2 mL), the mixture was extracted with ethyl acetate (10 mL). The organic layer was separated, dried over anhydrous magnesium sulfate and evaporated. GPC purification of the residue gave 2-(phenylethynyl)benzhydrol (**10**) asa colorless solid:mp 100–102 _C; 1H NMR (CDCl3) 2.52 (s, 1 H), 6.39 (s, 1 H), 7.20–7.61 (m, 14 H);13C NMR (CDCl3) 74.1, 87.4, 94.6, 123.0, 126.4, 126.6, 127.4, 127.5, 128.4, 128.4, 128.5, 128.8, 131.5, 132.4, 143.1, 145.5, 145.6; HRMS for C21H16O, calcd: 284.1201, found: 284.1237.

1. H. Yoshida, E. Shirakawa, T. Kurahashi, Y. Nakao and T. Hiyama, *Organometallics*, 2000, **19**, 5671. [↑](#endnote-ref-2)
2. M. W. Logue and K. Teng, *J. Org. Chem.*, 1982, **47**, 2549. [↑](#endnote-ref-3)
3. D. Toussaint and J. Suffert, *Org. Synth.*, 1998, **76**, 214. [↑](#endnote-ref-4)
4. D. Seyferth and F. G. Stone, *J. Am. Chem. Soc.*, 1957, 515. [↑](#endnote-ref-5)
5. Y. Himeshima, T. Sonoda and H. Kobayashi, *Chem. Lett.*,1983, 1211. [↑](#endnote-ref-6)
6. E. Yoshikawa, K. V. Radhakrishnan and Y. Yamamoto, *J. Am. Chem.* *Soc.*,2000, **122**, 7280. [↑](#endnote-ref-7)
7. D. Peña, D. Pérez, E. Guitián and L. Castedo, *J. Am. Chem.* *Soc.*,1999, **121**, 5827. [↑](#endnote-ref-8)
8. D. Peña, D. Pérez, E. Guitián and L. Castedo, *J. Org. Chem.*, 2000, **65**, 6944. [↑](#endnote-ref-9)
